# Supplementary material for: COVID-19 Impact and Vaccination Willingness among Romanian Patients with Autoimmune/Immune-Mediated Diseases
Source: MDPI journal article supplement (doi:10.3390/healthcare9121707), 2021-12-08
Supplement: s1 [file s1]

## Questionnaire

### General Data:

Gender (Male/Female/Other)

Age

Do you work in the medical field? (No, contact with the medical field, doctor, nurse)

What Autoimmune/immune mediated disease do you have? (Multiple-choice question)

What is your background therapy? (Multiple-choice question)

Do you take Biologic DMARDs? (Yes/No)

When was your immune disorder diagnosed? (Open-ended question)

When was the last date of the disease aggravation (flare)? (Open-ended question)

Do you have pulmonary damage as a consequence of your immune disease? (Yes/No)

What other pathologies do you have? (Multiple-choice question)

### A. Access to medical care during the pandemic

Have you encountered difficulties in accessing medical care since the beginning of the pandemic? (Yes/No)

If yes, why? (postponed visits for fear of infection/ my regular hospital became a COVID-19 support facility/ the appointments were difficult to obtain/ other response)

If no, how? (did not require medical care/ assessed by the attending physician at their private practice and using telemedicine/ addressed to primary care physicians/ the hospital continued its regular activity)

### B. SARS-CoV-2 infection in subjects with autoimmune and immune-mediated diseases

Did you have symptoms resembling COVID-19? (Yes/No)

Did you get tested for COVID-19? (Yes, the result was positive-was in contact with a positive person/Yes, the result was positive-without contact with a positive person/Yes, the result was negative/No, because I had no contact with positive people and nor symptoms/No, because I had no symptoms, although I had contact with positive people/No, although I had symptoms, because I was afraid of hospitalization)

Have you tested positive for COVID19? (Yes/No)

If yes, by which type of test? (RT-PCR/rapid test)

Mention the date of COVID-19 diagnosis. (Open-ended question)

What symptoms did you have? (Multiple-choice question)

How was COVID-19 managed? (hospitalised, but I don't think I needed to/ hospitalised, because that was the law/ hospitalised (I needed to)/monitored at home/not monitored)

Did you have pulmonary involvement secondary to SARS-CoV-2 infection? (No/ Not investigated/ Yes- mention the degree of the involvement)

If admitted to the hospital, did you require oxigenotherapy? (Yes/No)

Did you require ICU admission? (Yes/No)

Mention the length of hospitalisation. (Open-ended question)

What treatment was recommended for COVID-19? (Multiple-choice question)

How was the treatment for your immune disease managed during the infection? (continued without changes/ doses have been adjusted/ immunosuppressive therapy has been stopped)

What was the evolution of the immune pathology during the pandemic? (Stationary/ it got worse- have not had COVID/ got worse after COVID)

### **C. Perspective, basic knowledge and willingness to be immunized against SARS-CoV-2**

Do you consider yourself informed regarding the national SARS-CoV-2 immunization program? (Yes/No)

Where did you get the information about the vaccination program? (Multiple-choice question)

Do you want to get vaccinated against SARS-CoV-2? (Yes/No, because I don't think I'll get in touch with infected people/ No, because I had COVID-19/No, because I'm afraid of possible side effects/ No, because I don't think it works/ No, because the doctor advised me not to get vaccinated)

Do you know the possible side effects of the SARS-CoV-2 vaccine? (Semi-structured, multiple-choice question)

Do you consider yourself at higher risk of developing side effects given your immune pathology? (No, I have no higher risk than the rest of the population/ Yes, but I will take the risk/ Yes and I don't want to take the risk/ I don't know if I'm at risk or not)

Have you talked to your doctor about SARS-CoV-2 vaccination? (Semi-structured, multiple-choice question)

What is your attitude towards the FLU vaccine? (vaccinated annually/ never vaccinated/ usually got vaccinated but not every year/frequently/ vaccinated this year)

Did you get the Coronavirus Vaccine? (Yes/No)

**Table S1.** The incidence of COVID-19 among the autoimmune and immune mediated diseases reported \*.

| Immune disease                                           | Covid-19 patients positive (n = 135) | Covid-19 negative (n = 516) | p value      |
|----------------------------------------------------------|--------------------------------------|-----------------------------|--------------|
| <b>Rheumatic Diseases and Musculoskeletal Conditions</b> |                                      |                             |              |
| Rheumatoid arthritis                                     | 16 (11.9%)                           | 88 (17.1%)                  | 0.149        |
| Systemic lupus erythematosus                             | 22 (16.3%)                           | 77 (14.9%)                  | 0.687        |
| Sjögren's syndrome/SICCA                                 | 16 (11.9%)                           | 64 (12.4%)                  | 1            |
| Ankylosing spondylitis                                   | 13 (9.6%)                            | 56 (10.9%)                  | 0.755        |
| Psoriatic arthritis/psoriasis                            | 14 (10.4%)                           | 41 (7.9%)                   | 0.385        |
| Systemic sclerosis/limited scleroderma                   | 8 (5.9%)                             | 23 (4.5%)                   | 0.496        |
| Antiphospholipid syndrome                                | 6 (4.4%)                             | 20 (3.9%)                   | 0.805        |
| Dermatomyositis/polymyositis                             | 1 (0.7%)                             | 11 (2.1%)                   | 0.476        |
| Mixed connective tissue disease                          | 2 (1.5%)                             | 8 (1.6%)                    | 1            |
| Behçet's disease                                         | 0 (0%)                               | 3 (0.6%)                    | 1            |
| Granulomatosis with polyangiitis                         | 4 (3%)                               | 1 (0.2%)                    | <b>0.007</b> |
| Microscopic polyangiitis                                 | 1 (0.7%)                             | 2 (0.4%)                    | 0.503        |
| Giant cell arteritis                                     | 2 (1.5%)                             | 3 (0.6%)                    | 0.278        |
| Takayasu arteritis                                       | 1 (0.7%)                             | 0 (0%)                      | 0.207        |
| Polyarteritis nodosa                                     | 0 (0%)                               | 1 (0.2%)                    | 1            |
| Henoch-Schönlein purpura                                 | 0 (0%)                               | 1 (0.2%)                    | 1            |
| Cryoglobulinemia                                         | 0 (0%)                               | 1 (0.2%)                    | 1            |
| <b>Gastroenterological and hepatic diseases</b>          |                                      |                             |              |
| Inflammatory bowel disease                               | 14 (10.4%)                           | 30 (5.8%)                   | 0.081        |
| Celiac disease                                           | 4 (3%)                               | 16 (3.1%)                   | 1            |
| Primary biliary cholangitis                              | 3 (2.2%)                             | 6 (1.2%)                    | 0.402        |
| Autoimmune hepatitis                                     | 2 (1.5%)                             | 10 (1.9%)                   | 1            |
| <b>Neurological diseases</b>                             |                                      |                             |              |
| Myasthenia gravis                                        | 7 (5.2%)                             | 23 (4.5%)                   | 0.651        |
| Multiple sclerosis                                       | 1 (0.7%)                             | 24 (4.7%)                   | 0.041        |
| Autoimmune encephalomyelitis                             | 1 (0.7%)                             | 1 (0.2%)                    | 0.372        |
| <b>Hematological diseases</b>                            |                                      |                             |              |
| Hemolytic anemia                                         | 1 (0.7%)                             | 1 (0.2)                     | 0.372        |
| Paroxysmal Nocturnal Hemoglobinuria                      | 1 (0.7%)                             | 0 (0.%)                     | 0.207        |
| Autoimmune thrombocytopenia                              | 0 (0%)                               | 3 (0.6%)                    | 1            |
| <b>Cutaneous diseases</b>                                |                                      |                             |              |
| Vitiligo                                                 | 2 (1.5%)                             | 8 (1.6%)                    | 1            |
| Cutaneous lupus                                          | 1 (0.7%)                             | 1 (0.2%)                    | 0.372        |
| Cutaneous vasculitis                                     | 1 (0.7%)                             | 3 (0.6%)                    | 1            |
| Pemphigus                                                | 0 (0%)                               | 1 (0.2%)                    | 1            |
| <b>Other immune mediated diseases</b>                    |                                      |                             |              |
| Autoimmune thyroid disease                               | 24 (17.8%)                           | 116 (22.5%)                 | 0.289        |
| Sarcoidosis                                              | 4 (3%)                               | 4 (0.8%)                    | 0.062        |
| Type 1 diabetes mellitus                                 | 1 (0.7%)                             | 2 (0.4%)                    | 0.503        |
| Hyper IgD syndrome                                       | 0 (0%)                               | 1 (0.2%)                    | 1            |

\* Participants may report more than one autoimmune/immune mediated disease.
